# Supplementary material for: Equivariant Neural Networks Utilizing Molecular Clusters for Accurate Molecular Crystal Lattice Energy Predictions
Source: PubMed Central journal article supplement — ACS Omega. 2024 Sep 11;9(38):40269–82. doi: 10.1021/acsomega.4c07434 (PMC11425815; doi:10.1021/acsomega.4c07434), 2024-09-11
Supplement: ao4c07434_si_001.pdf [file ao4c07434_si_001.pdf]

# Supporting Information:

## Equivariant Neural Networks Utilizing Molecular Clusters for Accurate Molecular Crystal Lattice Energy Predictions

Ankur Kumar Gupta,<sup>\*,†</sup> Miko M. Stulajter,<sup>†</sup> Yusuf Shaidu,<sup>‡,¶</sup> Jeffrey B.  
Neaton,<sup>‡,¶,§</sup> and Wibe A. de Jong<sup>\*,†</sup>

<sup>†</sup>*Applied Mathematics and Computational Research Division, Lawrence Berkeley National  
Laboratory, Berkeley CA 94720*

<sup>‡</sup>*Department of Physics, University of California Berkeley, Berkeley, California 94720,  
United States*

<sup>¶</sup>*Materials Sciences Division, Lawrence Berkeley National Laboratory, Berkeley, California  
94720, United States*

<sup>§</sup>*Kavli Energy NanoSciences Institute at Berkeley, Berkeley, California 94720, United  
States*

E-mail: [ankur@lbl.gov](mailto:ankur@lbl.gov); [wadejong@lbl.gov](mailto:wadejong@lbl.gov)

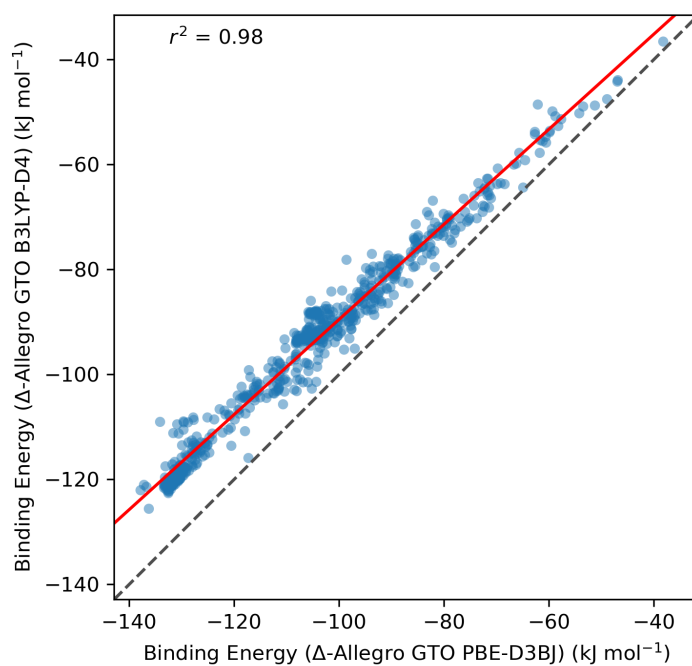

Figure S1: Parity plot for the binding energies predicted by the  $\Delta$ -Allegro model ( $r_{\text{cutoff}} = 6.0$  Å) using PBE-D3BJ and B3LYP-D4 theoretical methods.

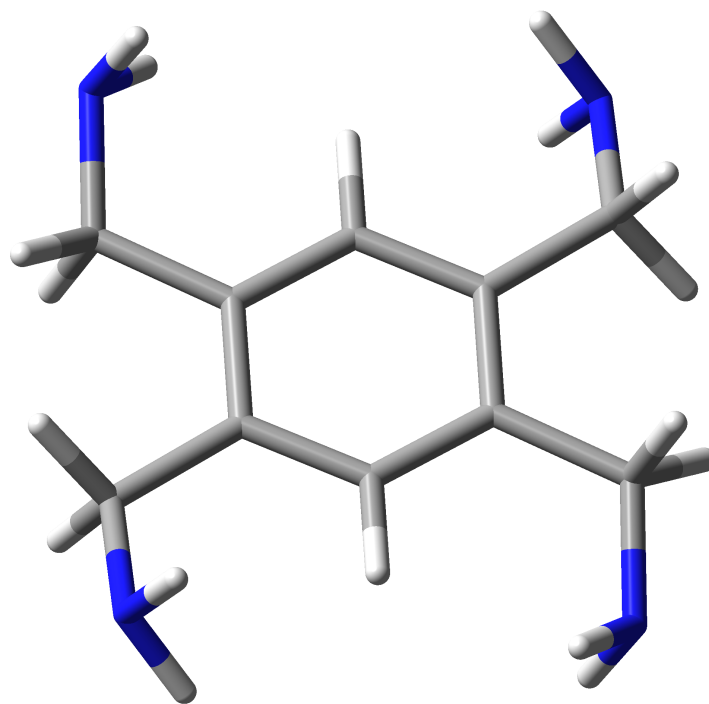

Figure S2: Alternate conformation for Benzene-1,2,4,5-tetrayltetramethanamine.

Table S1: Training and validation errors of the Allegro models on the molecular cluster dataset for Benzene-1,2,4,5-tetrayltetramethanamine.

| Model             | Training Energy MAE (mHa) | Validation Energy MAE (mHa) |
|-------------------|---------------------------|-----------------------------|
| Allegro           | 0.414                     | 0.545                       |
| $\Delta$ -Allegro | 0.322                     | 0.418                       |

Table S2: Training and validation errors of the Allegro model ( $l_{max} = 3$ ,  $multiplicity = 2$ ) on the molecular cluster dataset for oxabicyclo[3.2.0]hepta-1,4-diene.

| Model   | Training Energy MAE (mHa) | Validation Energy MAE (mHa) |
|---------|---------------------------|-----------------------------|
| Allegro | 0.09                      | 0.13                        |

Table S3: Training and validation errors of the Allegro model ( $l_{max} = 3$ ,  $multiplicity = 2$ ) on the molecular cluster dataset for Hydantoin.

| Model   | Training Energy MAE (mHa) | Validation Energy MAE (mHa) |
|---------|---------------------------|-----------------------------|
| Allegro | 0.20                      | 0.41                        |
